# Supplementary material
Source: Springer Nature journal article supplement (https://www.springerprofessional.de/resource/supplementary/13677_2012_21_MOESM11_ESM.pdf/10743430)
Supplement: MOESM11 [file 10743430]

# Connections

| Network                      |                          |                          | Overview |           |         |
|------------------------------|--------------------------|--------------------------|----------|-----------|---------|
| Peer address                 | From client              | To client                | Channels | User name | State   |
| <b>129.241.252.116:41057</b> | 604B/s<br>(32.4MB total) | 125B/s<br>(6.7MB total)  | 1        | guest     | running |
| <b>129.241.252.116:41058</b> | 220B/s<br>(11.8MB total) | 125B/s<br>(6.7MB total)  | 1        | guest     | running |
| <b>129.241.252.116:41059</b> | 330B/s<br>(18.0MB total) | 122B/s<br>(6.7MB total)  | 1        | guest     | running |
| <b>129.241.252.117:33649</b> | 227B/s<br>(12.1MB total) | 128B/s<br>(6.9MB total)  | 1        | guest     | running |
| <b>129.241.252.117:33650</b> | 347B/s<br>(18.5MB total) | 129B/s<br>(6.9MB total)  | 1        | guest     | running |
| <b>129.241.252.117:33651</b> | 623B/s<br>(33.3MB total) | 128B/s<br>(6.9MB total)  | 1        | guest     | running |
| <b>129.241.252.118:49885</b> | 585B/s<br>(32.0MB total) | 121B/s<br>(6.6MB total)  | 1        | guest     | running |
| <b>129.241.252.118:49886</b> | 325B/s<br>(17.8MB total) | 121B/s<br>(6.6MB total)  | 1        | guest     | running |
| <b>129.241.252.118:49887</b> | 214B/s<br>(11.7MB total) | 121B/s<br>(6.6MB total)  | 1        | guest     | running |
| <b>129.241.252.119:48262</b> | 229B/s<br>(12.2MB total) | 129B/s<br>(6.9MB total)  | 1        | guest     | running |
| <b>129.241.252.119:48263</b> | 347B/s<br>(18.5MB total) | 129B/s<br>(6.9MB total)  | 1        | guest     | running |
| <b>129.241.252.119:48264</b> | 626B/s<br>(33.3MB total) | 129B/s<br>(6.9MB total)  | 1        | guest     | running |
| <b>129.241.252.119:49251</b> | 249B/s<br>(13.5MB total) | 129B/s<br>(7.0MB total)  | 1        | guest     | running |
| <b>129.241.252.119:49252</b> | 367B/s<br>(20.0MB total) | 129B/s<br>(7.0MB total)  | 1        | guest     | running |
| <b>129.241.252.119:49253</b> | 646B/s<br>(35.1MB total) | 129B/s<br>(7.0MB total)  | 1        | guest     | running |
| <b>129.241.252.119:49254</b> | 229B/s<br>(12.4MB total) | 129B/s<br>(7.0MB total)  | 1        | guest     | running |
| <b>129.241.252.119:49255</b> | 348B/s<br>(19.1MB total) | 129B/s<br>(10.8MB total) | 1        | guest     | running |
| <b>129.241.252.119:49256</b> | 626B/s<br>(34.0MB total) | 129B/s<br>(7.0MB total)  | 1        | guest     | running |
